# Supplementary material for: Hepatocyte nuclear factor 4α regulates megalin expression in proximal tubular cells
Source: PubMed Central journal article supplement (PMC6295598; doi:10.1016/j.bbrep.2018.11.010), 2018-12-12
Supplement: mmc2.pdf [file mmc2.pdf]

Supplementary Table 1. Primers used in quantitative RT-PCR

| Gene                     |        | Nucleotide sequence                                | Gene                     |        | Nucleotide sequence                                |
|--------------------------|--------|----------------------------------------------------|--------------------------|--------|----------------------------------------------------|
| human<br><i>SLC1A1</i>   | F<br>R | accctgatcattgctgctg<br>ggagagctttccacaatgc         | human<br><i>SLC16A2</i>  | F<br>R | agtgactccatccctggactt<br>ggggaatcatcatggacatc      |
| human<br><i>SLC2A1</i>   | F<br>R | gtcaacacggccttcaactg<br>ggcatgagtatggcacaacc       | human<br><i>SLC16A3</i>  | F<br>R | gagtttgggatcggttacag<br>cggttcacgcacacactg         |
| human<br><i>SLC2A9</i>   | F<br>R | ttatctgcattggcgtgttc<br>gcagggaccacaatcactc        | human<br><i>SLC16A4</i>  | F<br>R | tctttgtgactatgggacttct<br>gctgtagaaaagagccaatcgtt  |
| human<br><i>SLC3A1</i>   | F<br>R | tggaacgatggaagatttga<br>cactcgtgtggttggtatga       | human<br><i>SLC16A5</i>  | F<br>R | aacggccccctgagatcat<br>ccactcatggctggctct          |
| human<br><i>SLC4A1</i>   | F<br>R | tctcaggaacgtggagctt<br>ggccactcgcgtattcat          | human<br><i>SLC16A6</i>  | F<br>R | tccaatagcaggatctcatgg<br>gaaacgattgctcaggactgt     |
| human<br><i>SLC4A7</i>   | F<br>R | gccataattgcatttggaga<br>ccgtgagaccaataaca          | human<br><i>SLC16A7</i>  | F<br>R | tgtggcccagttctcttgg<br>tgctgctaccacaatagccc        |
| human<br><i>SLC5A1</i>   | F<br>R | gccattggaggctttgaa<br>caccaccccagccttaatatag       | human<br><i>SLC16A8</i>  | F<br>R | ctggtgtgctcgtggagg<br>ccggccaggtagaatgatc          |
| human<br><i>SLC5A2</i>   | F<br>R | tgctgacatcctagtcttctg<br>tgttggtctgcacatggac       | human<br><i>SLC16A9</i>  | F<br>R | gcttggcctgattcaaca<br>gcatccatccagtcacatagaa       |
| human<br><i>SLC5A12</i>  | F<br>R | ccaggacttttgggcttg<br>aaaggtcactgttgccaagg         | human<br><i>SLC16A10</i> | F<br>R | ttgggctcatgtccagttct<br>accaatgaaggctggatgc        |
| human<br><i>SLC6A6</i>   | F<br>R | cgccttcgtgtgtagcatc<br>gctgcatagtagcaaaagactga     | human<br><i>SLC16A11</i> | F<br>R | cgtattcggggctctgac<br>tcagcccataggccacag           |
| human<br><i>SLC6A8</i>   | F<br>R | tgggaggtgacccttctg<br>cgtaggggaatgtagcagtga        | human<br><i>SLC16A12</i> | F<br>R | gcagtccatacttgggtgag<br>caaagccaagcaacacagaa       |
| human<br><i>SLC6A19</i>  | F<br>R | tcccctactgtgtcagagc<br>gcgaactccaggtagcagca        | human<br><i>SLC16A13</i> | F<br>R | tgcagatgatagagagcatcg<br>gaagccgtgtagttgcctgt      |
| human<br><i>SLC7A7</i>   | F<br>R | ccagtgccttctctgctctt<br>agccccacaaagaaccagta       | human<br><i>SLC16A14</i> | F<br>R | ctatgctgcaaactgtgcatt<br>gaaataactgcccaccatga      |
| human<br><i>SLC7A9</i>   | F<br>R | catgaacgtgtcctacttcacc<br>aacacggtcaccaaatgtca     | human<br><i>SLC17A1</i>  | F<br>R | acttgtgactggagtattctgtgaa<br>agagaagacatcggccacagc |
| human<br><i>SLC9A1</i>   | F<br>R | tctcaccgtcttctgtcag<br>atggagcgccttcgtctctt        | human<br><i>SLC17A3</i>  | F<br>R | gggtggcccttctgtctc<br>ggaaacggggctcatcataaa        |
| human<br><i>SLC9A3</i>   | F<br>R | ctgaaggatgccatcagctac<br>gaccacgttgcgtgct          | human<br><i>SLC19A1</i>  | F<br>R | cagttcctcgtgcccatc<br>ggcaaagaacgtgttgacc          |
| human<br><i>SLC9A3R1</i> | F<br>R | caatggggagatacagaaggag<br>ctcgtggtgtcactggag       | human<br><i>SLC19A2</i>  | F<br>R | ccttctgaccccgctacc<br>agcaccaggtaagagtaagtcca      |
| human<br><i>SLC9A8</i>   | F<br>R | cccagtcaccagatcctc<br>aggccaagaaatgcaaacac         | human<br><i>SLC19A3</i>  | F<br>R | aaaactgaccagtcagagaga<br>ggacataatcggtaggacaa      |
| human<br><i>SLC10A2</i>  | F<br>R | tggtgctcattataggatgctg<br>gcagtgtggagcatgtggt      | human<br><i>SLC20A2</i>  | F<br>R | catggggaaggactcact<br>ggaggggatcaccactgt           |
| human<br><i>SLC11A2</i>  | F<br>R | ctcgacactggctgtggac<br>ccccactgcccacaaatgta        | human<br><i>SLC21A8</i>  | F<br>R | tcaagtggattaaaaagcatacagtg<br>ttcaccacagtgctgagta  |
| human<br><i>SLC13A1</i>  | F<br>R | tgtttacttatagggtctattc<br>gtggagagtaataaaaagcaacaa | human<br><i>SLC21A20</i> | F<br>R | ctggaggcttctgcttccac<br>gcttctcaacagtggaatgcta     |
| human<br><i>SLC15A1</i>  | F<br>R | ctccatggccttgggt<br>aactttaatttgacttcgtttcc        | human<br><i>SLC22A1</i>  | F<br>R | tctcttctcgtctactactgg<br>tggtccattatctttattgctca   |
| human<br><i>SLC15A2</i>  | F<br>R | caggcttggagtttcttattctcag<br>cgatgatattccaactgcaa  | human<br><i>SLC22A2</i>  | F<br>R | tcggctacatagcagacagg<br>cgataggttgggaaatgg         |
| human<br><i>SLC16A1</i>  | F<br>R | gggattggtgaccattgtg<br>catgtcattgagccgacct         | human<br><i>SLC22A5</i>  | F<br>R | gtgctgccactgtttgctta<br>gggggactcagggatgaa         |

| Gene                     |        | Nucleotide sequence                           | Gene                    |        | Nucleotide sequence                             |
|--------------------------|--------|-----------------------------------------------|-------------------------|--------|-------------------------------------------------|
| human<br><i>SLC22A6</i>  | F<br>R | gctggggaagggtgtct<br>attcccatgcctgtctgc       | human<br><i>SLC34A3</i> | F<br>R | gaaatccatgccgagtcc<br>cctccaagactggagcagaa      |
| human<br><i>SLC22A7</i>  | F<br>R | gatgggaaagcttttctga<br>agcccatcctgtctgt       | human<br><i>SLC34A3</i> | F<br>R | gaaatccatgccgagtcc<br>cctccaagactggagcagaa      |
| human<br><i>SLC22A8</i>  | F<br>R | gctcgtgcttgagacct<br>ccatgtagatggggaaggtg     | human<br><i>SLC40A1</i> | F<br>R | gctctagctgtgaaagctggc<br>agtccctccagggtttt      |
| human<br><i>SLC22A11</i> | F<br>R | ttcgcctccctgacctatc<br>acagtgcaggcctcttgc     | human<br><i>MATE1</i>   | F<br>R | gtgcttttctgtagccttc<br>cctgagccaccagattaatga    |
| human<br><i>SLC22A12</i> | F<br>R | ggattctggtgggagctg<br>taccatcacagccatctga     | human<br><i>MATE2-K</i> | F<br>R | tatactcccggctggact<br>tgcaagtctctctgtctct       |
| human<br><i>SLC22A13</i> | F<br>R | atgagacgcagccttga<br>cgatcacaaccaggtgaa       | human<br><i>AQP1</i>    | F<br>R | cctcctgactgggaactc<br>ggagggtcccgatgatct        |
| human<br><i>SLC23A3</i>  | F<br>R | tggactctccccagggt<br>tccagcagacaaaaccacag     | human<br><i>AQP7</i>    | F<br>R | gggttttgcttccagggt<br>cgcacagttagcaaaaggta      |
| human<br><i>SLC24A3</i>  | F<br>R | gtgtctgtgggcttttct<br>cgatcacagacagcgtgtagta  | human<br><i>AQP11</i>   | F<br>R | ggctgcactcatcactttt<br>aatgtagcgaaagtccaaag     |
| human<br><i>SLC25A8</i>  | F<br>R | tgaagccaacctcatgaca<br>ctacaggggagcgcgatgac   | human<br><i>KCNE1</i>   | F<br>R | tgtatccagaggaatagccaag<br>ggatcatctgggcattaag   |
| human<br><i>SLC26A1</i>  | F<br>R | gatgaccgggctttaccag<br>ctgcgaggtcaggatggt     | human<br><i>PKD1</i>    | F<br>R | agcctgaccgtgtggaag<br>ggacacacactccaaggaca      |
| human<br><i>SLC26A2</i>  | F<br>R | ggttggcagcactgtaacct<br>gacagaacaaaaccacttga  | human<br><i>LRP2</i>    | F<br>R | atagaggggagcaccactga<br>agcaatttctccgtgcat      |
| human<br><i>SLC26A3</i>  | F<br>R | tcggcacttccagacacata<br>gcgatctgggactgctttt   | human<br><i>BMP7</i>    | F<br>R | tccaagacgccaagaac<br>acagctcgtgcttcttacagg      |
| human<br><i>SLC26A4</i>  | F<br>R | cattgttaateccatccaagg<br>tgcaatagcataagccacca | human<br><i>ANG</i>     | F<br>R | cattgtcctgccgtttc<br>cagcacgaagaccaacaaca       |
| human<br><i>SLC28A1</i>  | F<br>R | catgctgggaggttgac<br>cacaggctcccgtgaaga       | human<br><i>PDGFD</i>   | F<br>R | tgtggctaacctggattcaa<br>tcccagttggtctctgaagc    |
| human<br><i>SLC28A2</i>  | F<br>R | caggggagctgaagctga<br>ggttggtgccattcagaga     | human<br><i>CUBN</i>    | F<br>R | ccgttagtgacgacaagggtg<br>ccaggtagtcattggagca    |
| human<br><i>SLC29A1</i>  | F<br>R | ccttctccaacggctacct<br>cacaggaagaaggccatgat   | human<br><i>AMN</i>     | F<br>R | gtgctgtgacctctgtggag<br>accaggaagggtgtccagta    |
| human<br><i>SLC29A2</i>  | F<br>R | acggagcctgaccttactt<br>gaagaggggcacgaacag     | human<br><i>HNF4A</i>   | F<br>R | gtgctgtgacctctgtggag<br>accaggaagggtgtccagta    |
| human<br><i>SLC34A1</i>  | F<br>R | gctccagcactccacat<br>atgttggagcccatgatga      | human<br><i>TBP</i>     | F<br>R | gaacatcatggatcagaacaaca<br>atagggattccgggagtcac |
