# Supplementary material for: Hepatocyte nuclear factor 4α regulates megalin expression in proximal tubular cells
Source: PubMed Central journal article supplement (PMC6295598; doi:10.1016/j.bbrep.2018.11.010), 2018-12-12
Supplement: mmc3.pdf [file mmc3.pdf]

Supplementary Table 2. Expression of proximal tubule-enriched genes

| Gene            | Empty     | + HNF4 $\alpha$ | Gene            | Empty     | + HNF4 $\alpha$ | Gene           | Empty     | + HNF4 $\alpha$ |
|-----------------|-----------|-----------------|-----------------|-----------|-----------------|----------------|-----------|-----------------|
| <i>SLC1A1</i>   | 1.00±0.37 | 1.17±0.12       | <i>SLC16A7</i>  | 1.00±0.09 | 0.86±0.14       | <i>SLC24A3</i> | N.D.      | N.D.            |
| <i>SLC2A1</i>   | 1.00±0.18 | 1.11±0.04       | <i>SLC16A8</i>  | N.D.      | N.D.            | <i>SLC25A8</i> | 1.00±0.20 | 1.00±0.08       |
| <i>SLC2A9</i>   | 1.00±0.05 | 1.06±0.05       | <i>SLC16A9</i>  | 1.00±0.24 | 1.08±0.29       | <i>SLC26A1</i> | 1.00±0.18 | 1.31±0.44       |
| <i>SLC3A1</i>   | 1.00±0.68 | 0.80±0.25       | <i>SLC16A10</i> | 1.00±0.23 | 1.05±0.04       | <i>SLC26A2</i> | 1.00±0.10 | 0.92±0.16       |
| <i>SLC4A7</i>   | 1.00±0.10 | 0.96±0.06       | <i>SLC16A11</i> | 1.00±0.45 | 1.24±0.14       | <i>SLC26A3</i> | N.D.      | N.D.            |
| <i>SLC5A1</i>   | N.D.      | N.D.            | <i>SLC16A12</i> | 1.00±0.34 | 1.09±0.10       | <i>SLC26A4</i> | N.D.      | N.D.            |
| <i>SLC5A2</i>   | N.D.      | N.D.            | <i>SLC16A13</i> | 1.00±0.17 | 1.16±0.11       | <i>SLC26A6</i> | 1.00±0.08 | 1.24±0.06       |
| <i>SLC5A12</i>  | N.D.      | N.D.            | <i>SLC16A14</i> | 1.00±0.45 | 0.59±0.19       | <i>SLC28A1</i> | N.D.      | N.D.            |
| <i>SLC6A6</i>   | 1.00±0.03 | 0.97±0.08       | <i>SLC17A1</i>  | 1.00±0.21 | 0.87±0.52       | <i>SLC28A2</i> | N.D.      | N.D.            |
| <i>SLC6A8</i>   | 1.00±0.19 | 1.07±0.10       | <i>SLC17A3</i>  | 1.00±0.04 | 1.01±0.31       | <i>SLC29A1</i> | 1.00±0.16 | 1.13±0.04       |
| <i>SLC6A19</i>  | N.D.      | N.D.            | <i>SLC19A1</i>  | 1.00±0.20 | 1.05±0.09       | <i>SLC29A2</i> | 1.00±0.27 | 1.08±0.16       |
| <i>SLC7A9</i>   | 1.00±0.54 | 0.87±0.31       | <i>SLC19A2</i>  | 1.00±0.17 | 1.16±0.08       | <i>SLC34A1</i> | N.D.      | N.D.            |
| <i>SLC9A1</i>   | 1.00±0.15 | 1.08±0.12       | <i>SLC19A3</i>  | N.D.      | N.D.            | <i>SLC34A3</i> | 1.00±0.27 | 0.74±0.18       |
| <i>SLC9A3</i>   | 1.00±0.40 | 0.63±0.24       | <i>SLC20A2</i>  | 1.00±0.06 | 1.23±0.06       | <i>SLC40A1</i> | 1.00±0.11 | 1.13±0.35       |
| <i>SLC9A3R1</i> | 1.00±0.20 | 1.33±0.05       | <i>SLC21A8</i>  | N.D.      | N.D.            | <i>MATE-1</i>  | 1.00±0.59 | 0.90±0.46       |
| <i>SLC9A8</i>   | 1.00±0.06 | 0.97±0.19       | <i>SLC21A20</i> | N.D.      | N.D.            | <i>MATE2-K</i> | 1.00±0.10 | 0.93±0.49       |
| <i>SLC10A2</i>  | N.D.      | N.D.            | <i>SLC22A1</i>  | 1.00±0.02 | 1.30±0.22       | <i>AQP1</i>    | N.D.      | N.D.            |
| <i>SLC11A2</i>  | 1.00±0.06 | 1.15±0.07       | <i>SLC22A2</i>  | 1.00±0.44 | 1.36±0.28       | <i>AQP7</i>    | 1.00±0.50 | 1.33±0.13       |
| <i>SLC13A1</i>  | N.D.      | N.D.            | <i>SLC22A5</i>  | 1.00±0.07 | 1.22±0.06       | <i>AQP11</i>   | 1.00±0.05 | 1.07±0.04       |
| <i>SLC15A1</i>  | 1.00±0.64 | 0.95±0.53       | <i>SLC22A6</i>  | N.D.      | N.D.            | <i>KCNE1</i>   | N.D.      | N.D.            |
| <i>SLC15A2</i>  | 1.00±0.30 | 0.99±0.30       | <i>SLC22A7</i>  | N.D.      | N.D.            | <i>PKD1</i>    | 1.00±0.08 | 0.86±0.21       |
| <i>SLC16A1</i>  | 1.00±0.31 | 1.16±0.15       | <i>SLC22A8</i>  | 1.00±0.41 | 0.86±0.21       | <i>BMP7</i>    | 1.00±0.50 | 1.20±0.41       |
| <i>SLC16A2</i>  | 1.00±0.08 | 1.34±0.18       | <i>SLC22A11</i> | N.D.      | N.D.            | <i>ANG</i>     | 1.00±0.21 | 0.99±0.05       |
| <i>SLC16A3</i>  | 1.00±0.24 | 0.72±0.09       | <i>SLC22A12</i> | N.D.      | N.D.            | <i>PDGFD</i>   | N.D.      | N.D.            |
| <i>SLC16A5</i>  | 1.00±0.17 | 1.10±0.03       | <i>SLC22A13</i> | 1.00±0.09 | 0.63±0.48       | <i>CUBN</i>    | 1.00±0.10 | 0.91±0.22       |
| <i>SLC16A6</i>  | 1.00±0.63 | 0.85±0.14       | <i>SLC23A3</i>  | 1.00±0.06 | 1.43±0.34       | <i>AMN</i>     | 1.00±0.47 | 1.02±0.36       |

N.D., not detected.
